# Supplementary material for: A switch from CD44+ cell to EMT cell drives the metastasis of prostate cancer
Source: PubMed Central journal article supplement (PMC4359227; doi:10.18632/oncotarget.2841), 2014-11-25
Supplement: oncotarget-06-1202-s001.pdf [file oncotarget-06-1202-s001.pdf]

# A switch from CD44<sup>+</sup> cell to EMT cell drives the metastasis of prostate cancer

## Supplementary Material

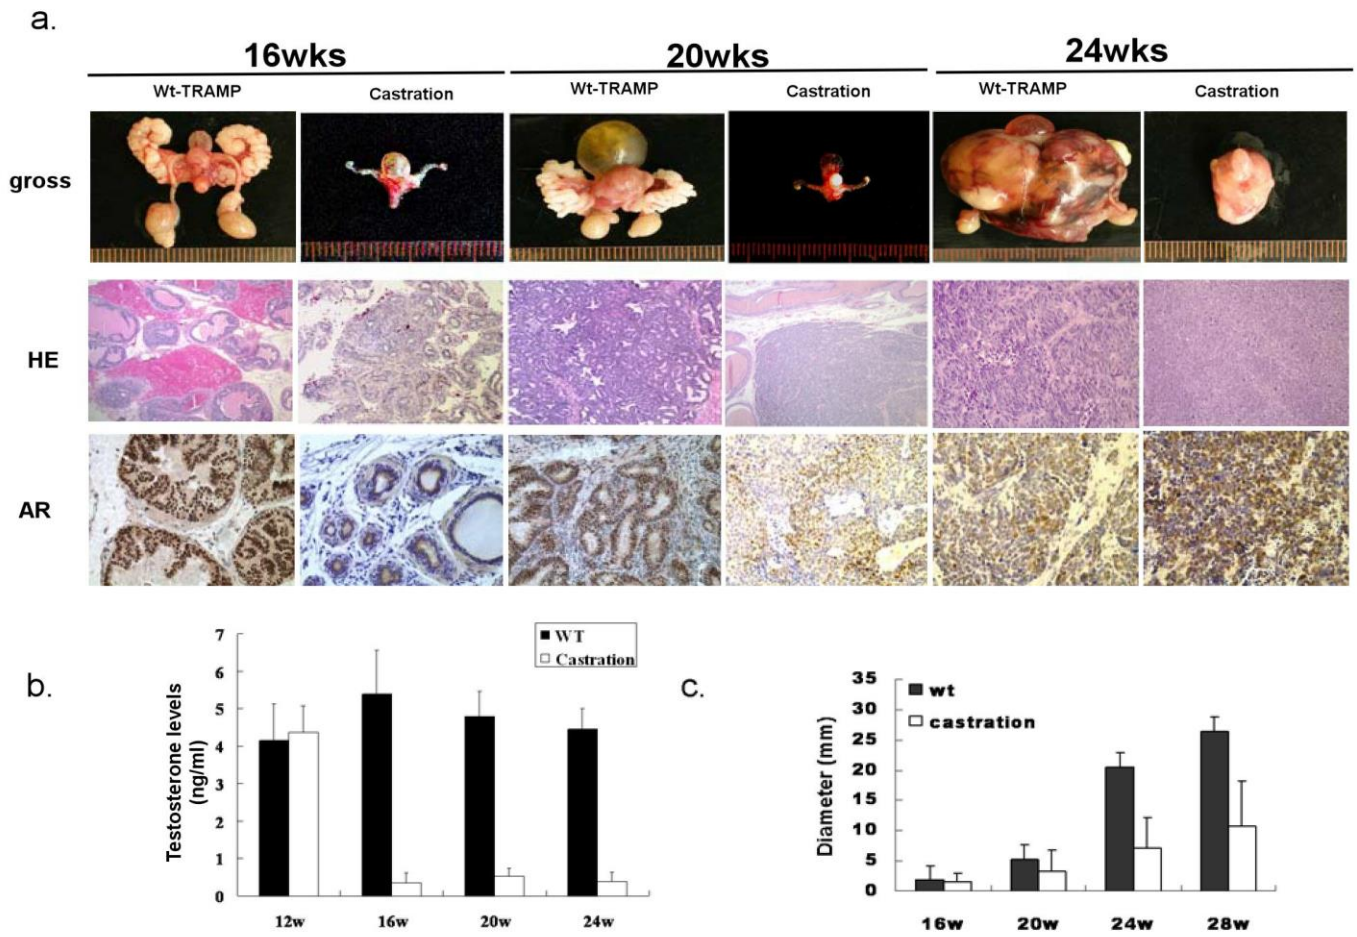

Supplemental Figure 1
